# Supplementary material for: Exercise Attenuates PCB-Induced Changes in the Mouse Gut Microbiome
Source: PubMed Central journal article supplement (PMC3672930; doi:10.1289/ehp.1306534), 2013-04-26
Supplement: ehp.1306534.s001.pdf [file ehp.1306534.s001.pdf]

**Supplemental Material**  
**Exercise Attenuates PCB-Induced Changes in the Mouse Gut**  
**Microbiome**

Jeong June Choi, Sung Yong Eum, Evadnie Rampersaud, Sylvia Daunert, Maria T  
Abreu, and Michal Toborek

**TABLE OF CONTENTS**

|                                                                |          |
|----------------------------------------------------------------|----------|
| <b>Table S1. Bacterial taxa present in exercised mice only</b> | <b>2</b> |
| <b>Table S2. Bacterial taxa present in sedentary mice only</b> | <b>6</b> |

**Supplemental Material, Table S1. Bacterial taxa present in exercised mice only**

| <b>Phylum</b> | <b>Class</b> | <b>Order</b>    | <b>Family</b>          | <b>Species</b>                 | <b>GenBank Accession ID</b> |
|---------------|--------------|-----------------|------------------------|--------------------------------|-----------------------------|
| Firmicutes    | Bacilli      | Lactobacillales | <i>Enterococcaceae</i> | <i>Enterococcus faecium</i>    | EF533987                    |
| Firmicutes    | Bacilli      | Lactobacillales | <i>Enterococcaceae</i> | <i>Enterococcus faecium</i>    | FJ378668                    |
| Firmicutes    | Bacilli      | Lactobacillales | <i>Enterococcaceae</i> | <i>Enterococcus faecium</i>    | FJ378683                    |
| Firmicutes    | Bacilli      | Lactobacillales | <i>Enterococcaceae</i> | <i>Enterococcus faecium</i>    | FJ378661                    |
| Firmicutes    | Bacilli      | Lactobacillales | <i>Enterococcaceae</i> | <i>Enterococcus faecium</i>    | FJ378674                    |
| Firmicutes    | Bacilli      | Lactobacillales | <i>Enterococcaceae</i> | <i>Enterococcus faecium</i>    | Y18294                      |
| Firmicutes    | Bacilli      | Lactobacillales | <i>Enterococcaceae</i> | <i>Enterococcus faecium</i>    | AJ874342                    |
| Firmicutes    | Bacilli      | Lactobacillales | <i>Enterococcaceae</i> | <i>Enterococcus faecium</i>    | AY057055                    |
| Firmicutes    | Bacilli      | Lactobacillales | <i>Enterococcaceae</i> | <i>Enterococcus faecium</i>    | AM157434                    |
| Firmicutes    | Bacilli      | Lactobacillales | <i>Enterococcaceae</i> | <i>Enterococcus faecium</i>    | EU878169                    |
| Firmicutes    | Bacilli      | Lactobacillales | <i>Enterococcaceae</i> | <i>Enterococcus faecium</i>    | AY653231                    |
| Firmicutes    | Bacilli      | Lactobacillales | <i>Enterococcaceae</i> | <i>Enterococcus faecium</i>    | EU807757                    |
| Firmicutes    | Bacilli      | Lactobacillales | <i>Enterococcaceae</i> | <i>Enterococcus faecalis</i>   | FJ378658                    |
| Firmicutes    | Bacilli      | Lactobacillales | <i>Enterococcaceae</i> | <i>Enterococcus faecium</i>    | AJ420800                    |
| Firmicutes    | Bacilli      | Lactobacillales | <i>Enterococcaceae</i> | <i>Enterococcus faecium</i>    | FJ378686                    |
| Firmicutes    | Bacilli      | Lactobacillales | <i>Enterococcaceae</i> | <i>Enterococcus gallinarum</i> | GQ337019                    |
| Firmicutes    | Bacilli      | Lactobacillales | <i>Enterococcaceae</i> | <i>Enterococcus faecium</i>    | EU878170                    |
| Firmicutes    | Bacilli      | Lactobacillales | <i>Enterococcaceae</i> | <i>Enterococcus faecium</i>    | EU428012                    |

| <b>Phylum</b>  | <b>Class</b>        | <b>Order</b>    | <b>Family</b>           | <b>Species</b>                    | <b>GenBank Accession ID</b> |
|----------------|---------------------|-----------------|-------------------------|-----------------------------------|-----------------------------|
| Firmicutes     | Bacilli             | Lactobacillales | <i>Enterococcaceae</i>  | <i>Enterococcus faecium</i>       | FJ378689                    |
| Firmicutes     | Bacilli             | Lactobacillales | <i>Enterococcaceae</i>  | <i>Enterococcus faecium</i>       | FJ378697                    |
| Firmicutes     | Bacilli             | Lactobacillales | <i>Enterococcaceae</i>  | <i>Enterococcus faecium</i>       | NZ_ACIY01000209             |
| Firmicutes     | Bacilli             | Lactobacillales | <i>Enterococcaceae</i>  | <i>Enterococcus faecium</i>       | FJ378673                    |
| Firmicutes     | Bacilli             | Lactobacillales | <i>Enterococcaceae</i>  | <i>Enterococcus faecium</i>       | AF070223                    |
| Firmicutes     | Bacilli             | Lactobacillales | <i>Enterococcaceae</i>  | <i>Enterococcus faecium</i>       | FJ378670                    |
| Firmicutes     | Bacilli             | Lactobacillales | <i>Enterococcaceae</i>  | <i>Enterococcus faecium</i>       | EU003448                    |
| Firmicutes     | Bacilli             | Lactobacillales | <i>Enterococcaceae</i>  | <i>Enterococcus faecium</i>       | FJ378693                    |
| Firmicutes     | Bacilli             | Lactobacillales | <i>Enterococcaceae</i>  | <i>Enterococcus lactis</i>        | FJ015055                    |
| Firmicutes     | Bacilli             | Lactobacillales | <i>Enterococcaceae</i>  | <i>Enterococcus faecium</i>       | AY971749                    |
| Firmicutes     | Bacilli             | Bacillales      | <i>Bacillaceae</i>      | <i>Bacillus subtilis</i>          | EF990557                    |
| Firmicutes     | Bacilli             | Lactobacillales | <i>Enterococcaceae</i>  | <i>Enterococcus casseliflavus</i> | X76177                      |
| Firmicutes     | Bacilli             | Lactobacillales | <i>Streptococcaceae</i> |                                   | AY005040                    |
| Proteobacteria | Gammaproteobacteria | Pseudomonadales | <i>Pseudomonadaceae</i> |                                   | EU538172                    |
| Firmicutes     | Bacilli             | Lactobacillales | <i>Aerococcaceae</i>    | <i>Aerococcus urinae</i>          | U64457                      |
| Firmicutes     | Bacilli             | Lactobacillales | <i>Enterococcaceae</i>  | <i>Enterococcus hirae</i>         | FJ851687                    |
| Firmicutes     | Bacilli             | Lactobacillales | <i>Enterococcaceae</i>  | <i>Enterococcus lactis</i>        | EU717965                    |
| Bacteroidetes  | Bacteroidia         | Bacteroidales   | <i>Bacteroidaceae</i>   |                                   | EU763339                    |
| Firmicutes     | Clostridia          | Clostridiales   | <i>Lachnospiraceae</i>  |                                   | DQ015047                    |

| <b>Phylum</b>  | <b>Class</b>        | <b>Order</b>      | <b>Family</b>                    | <b>Species</b>                     | <b>GenBank Accession ID</b> |
|----------------|---------------------|-------------------|----------------------------------|------------------------------------|-----------------------------|
| Actinobacteria | Actinobacteria      | Actinomycetales   | <i>Micromonosporaceae</i>        | <i>Catenuloplanes niger</i>        | FJ715940                    |
| Firmicutes     | Bacilli             | Lactobacillales   | <i>Enterococcaceae</i>           | <i>Enterococcus villorum</i>       | AF335596                    |
| Firmicutes     | Bacilli             | Lactobacillales   | <i>Enterococcaceae</i>           |                                    | GQ155230                    |
| Firmicutes     | Bacilli             | Lactobacillales   | <i>Aerococcaceae</i>             | <i>Aerococcus viridans</i>         | AY707773                    |
| Bacteroidetes  | Bacteroidia         | Bacteroidales     | <i>Bacteroidaceae</i>            |                                    | EU768032                    |
| Bacteroidetes  | Bacteroidia         | Bacteroidales     | <i>RikenellaceaeII</i>           | <i>Bacteroides nordii</i>          | EU887841                    |
| Firmicutes     | Bacilli             | Lactobacillales   | <i>Enterococcaceae</i>           | <i>Enterococcus canintestini</i>   | GQ337018                    |
| Firmicutes     | Clostridia          | Clostridiales     | <i>Lachnospiraceae</i>           |                                    | DQ795656                    |
| Firmicutes     | Clostridia          | Clostridiales     | <i>Lachnospiraceae</i>           | <i>Eubacterium rectale</i>         | FJ367978                    |
| Proteobacteria | Gammaproteobacteria | Enterobacteriales | <i>Enterobacteriaceae</i>        | <i>Citrobacter freundii</i>        | AY163805                    |
| Bacteroidetes  | Bacteroidia         | Bacteroidales     | <i>Bacteroidaceae</i>            |                                    | EU767916                    |
| Firmicutes     | Clostridia          | Clostridiales     | <i>Lachnospiraceae</i>           |                                    | EU452598                    |
| Firmicutes     | Bacilli             | Bacillales        | <i>Bacillaceae</i>               | <i>Bacillus subtilis</i>           | FJ544352                    |
| Bacteroidetes  | Bacteroidia         | Bacteroidales     | <i>Bacteroidaceae</i>            |                                    | EU762810                    |
| Firmicutes     | Bacilli             | Lactobacillales   | <i>Enterococcaceae</i>           | <i>Enterococcus hirae</i>          | AJ301834                    |
| Bacteroidetes  | Bacteroidia         | Bacteroidales     | <i>Bacteroidaceae</i>            |                                    | EU763101                    |
| Nitrospirae    | Nitrospira          | Nitrospirales     | <i>Thermodesulfovibrionaceae</i> |                                    | FJ638591                    |
| Firmicutes     | Bacilli             | Bacillales        | <i>Bacillaceae</i>               | <i>Geobacillus thermoleovorans</i> | AY450926                    |
| Proteobacteria | Betaproteobacteria  | Burkholderiales   | <i>Aquabacteriaceae</i>          |                                    | GQ102733                    |

| <b>Phylum</b>  | <b>Class</b>    | <b>Order</b>       | <b>Family</b>             | <b>Species</b>             | <b>GenBank Accession ID</b> |
|----------------|-----------------|--------------------|---------------------------|----------------------------|-----------------------------|
| Actinobacteria | Actinobacteria  | Actinomycetales    | <i>Corynebacteriaceae</i> |                            | GQ035028                    |
| Firmicutes     | Clostridia      | Clostridiales      | <i>Lachnospiraceae</i>    | <i>Clostridium nexile</i>  | X73443                      |
| Firmicutes     | Clostridia      | Clostridiales      | <i>Ruminococcaceae</i>    |                            | FJ370347                    |
| Bacteroidetes  | Bacteroidia     | Bacteroidales      | <i>RikenellaceaeII</i>    |                            | EU771159                    |
| Bacteroidetes  | Flavobacteria   | Flavobacteriales   | <i>Flavobacteriaceae</i>  |                            | GQ098103                    |
| Firmicutes     | Clostridia      | Clostridiales      | <i>Lachnospiraceae</i>    |                            | AY982924                    |
| Firmicutes     | Clostridia      | Clostridiales      | <i>Lachnospiraceae</i>    | <i>Eubacterium rectale</i> | FJ684683                    |
| Tenericutes    | Mollicutes      | RF39               | unclassified              |                            | EU842453                    |
| Firmicutes     | Bacilli         | Bacillales         | <i>Planococcaceae</i>     | <i>Ureibacillus</i>        | AB170018                    |
| Bacteroidetes  | Bacteroidia     | Bacteroidales      | <i>RikenellaceaeII</i>    |                            | EU504144                    |
| Bacteroidetes  | Sphingobacteria | Sphingobacteriales | <i>Saprospiraceae</i>     |                            | GU230422                    |

**Supplemental Material, Table S2. Bacterial taxa present in sedentary mice only**

| <b>Phylum</b>  | <b>Class</b>        | <b>Order</b>       | <b>Family</b>              | <b>Species</b>             | <b>GenBank Accession ID</b> |
|----------------|---------------------|--------------------|----------------------------|----------------------------|-----------------------------|
| Tenericutes    | Erysipelotrichi     | Erysipelotrichales | <i>Erysipelotrichaceae</i> | <i>C11_K211</i>            | DQ015346                    |
| Firmicutes     | Clostridia          | Clostridiales      | <i>Ruminococcaceae</i>     |                            | EU453704                    |
| Firmicutes     | Clostridia          | Clostridiales      | <i>Lachnospiraceae</i>     |                            | EF099589                    |
| Firmicutes     | Bacilli             | Bacillales         | <i>Bacillaceae</i>         | <i>Bacillus halodurans</i> | EF113315                    |
| Firmicutes     | Clostridia          | Clostridiales      | <i>Lachnospiraceae</i>     |                            | AB494756                    |
| Firmicutes     | Clostridia          | Clostridiales      | <i>Lachnospiraceae</i>     |                            | EU453854                    |
| Firmicutes     | Clostridia          | Clostridiales      | <i>Lachnospiraceae</i>     |                            | FJ674265                    |
| Firmicutes     | Clostridia          | Clostridiales      | <i>Lachnospiraceae</i>     |                            | EU472163                    |
| Bacteroidetes  | Bacteroidia         | Bacteroidales      | <i>RikenellaceaeII</i>     |                            | CU922957                    |
| Firmicutes     | Clostridia          | Clostridiales      | <i>Ruminococcaceae</i>     |                            | EF399615                    |
| Proteobacteria | Betaproteobacteria  | Burkholderiales    | <i>Aquabacteriaceae</i>    |                            | GQ115257                    |
| Proteobacteria | Betaproteobacteria  | Burkholderiales    | <i>Aquabacteriaceae</i>    |                            | GQ037260                    |
| Proteobacteria | Betaproteobacteria  | Burkholderiales    | <i>Aquabacteriaceae</i>    |                            | GQ099604                    |
| Firmicutes     | Clostridia          | Clostridiales      | <i>Ruminococcaceae</i>     |                            | FJ682721                    |
| Proteobacteria | Gammaproteobacteria | Pseudomonadales    | <i>Pseudomonadaceae</i>    |                            | EF620447                    |
| Firmicutes     | Clostridia          | Clostridiales      | <i>Ruminococcaceae</i>     |                            | FJ674232                    |
| Proteobacteria | Gammaproteobacteria | Oceanospirillales  | <i>Oceanospirillaceae</i>  |                            | FJ403057                    |
| Firmicutes     | Clostridia          | Clostridiales      | <i>Ruminococcaceae</i>     |                            | AB185773                    |

| <b>Phylum</b>  | <b>Class</b>       | <b>Order</b>     | <b>Family</b>            | <b>Species</b> | <b>GenBank<br/>Accession<br/>ID</b> |
|----------------|--------------------|------------------|--------------------------|----------------|-------------------------------------|
| Firmicutes     | Clostridia         | Clostridiales    | <i>Ruminococcaceae</i>   |                | FJ371863                            |
| Firmicutes     | Bacilli            | Exiguobacterales | <i>Exiguobacteraceae</i> |                | FJ821599                            |
| Proteobacteria | Betaproteobacteria | Burkholderiales  | <i>Aquabacteriaceae</i>  |                | GQ071248                            |
| Firmicutes     | Bacilli            | Bacillales       | <i>Bacillaceae</i>       |                | AB245377                            |
| Firmicutes     | Clostridia         | Clostridiales    | <i>Ruminococcaceae</i>   |                | EU460195                            |
| Firmicutes     | Clostridia         | Clostridiales    | <i>Lachnospiraceae</i>   |                | DQ800645                            |
| Firmicutes     | Clostridia         | Clostridiales    | <i>Lachnospiraceae</i>   |                | AJ408971                            |
| Bacteroidetes  | Bacteroidia        | Bacteroidales    | <i>Rikenellaceae</i>     |                | AY993090                            |
